# Supplementary material
Source: MDPI journal article supplement (https://www.mdpi.com/2073-4344/8/10/468)
Supplement: s1 [file s1]

# Preparation of a flower-like immobilized D-psicose 3-epimerase with enhanced catalytic performance

Lu Zheng, Yining Sun, Jing Wang, He Huang, Xin Geng, Yi Tong, Zhi Wang

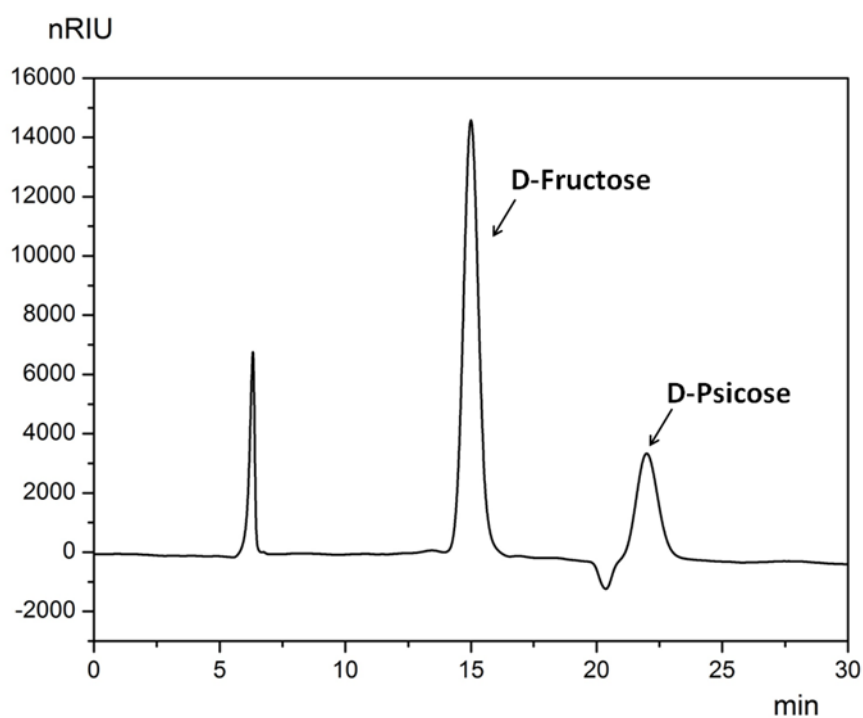

**Figure S1. HPLC analysis profiles of the epimerization products catalyzed by DPEase**
